# Supplementary material for: Nanoengineered Metasurface Immunosensor with over 1000-Fold Electrochemiluminescence Enhancement for Ultra-sensitive Bioassay
Source: PubMed Central journal article supplement — iScience. 2019 Jul 3;17:267–76. doi: 10.1016/j.isci.2019.06.042 (PMC6639682; doi:10.1016/j.isci.2019.06.042), 2019-07-03
Supplement: mmc1.pdf [file mmc1.pdf]

**ISCI, Volume 17**

**Supplemental Information**

**Nanoengineered Metasurface Immunosensor with  
over 1000-Fold Electrochemiluminescence  
Enhancement for Ultra-sensitive Bioassay**

**Chuanping Li, Shanshan Wang, Haijuan Li, Muhammad Saqib, Chen Xu, and Yongdong Jin**

## Supplemental Information

### **Core/Shell/Gap-Nanoengineered Metasurface Immunosensor with over 1000-Fold Electrochemiluminescence Enhancement for Ultra-sensitive Bioassay**

Chuanping Li<sup>1,2,4,5</sup>, Shanshan Wang<sup>1,3,5</sup>, Haijuan Li<sup>1</sup>, Muhammad Saqib<sup>1</sup>, Chen Xu<sup>1</sup>  
& Yongdong Jin<sup>1,2,\*</sup>

<sup>1</sup>State Key Laboratory of Electroanalytical Chemistry, Changchun Institute of Applied Chemistry, Chinese Academy of Sciences, 5625 Renmin Street, Changchun 130022, P. R. China.

<sup>2</sup>University of Chinese Academy of Sciences, Beijing 100049, P. R. China.

<sup>3</sup>College of Chemistry, Liaoning University, Shenyang 110036, P. R. China.

<sup>4</sup>current address: College of Biological and Chemical Engineering, Anhui Polytechnic University, Wuhu 241000, P. R. China.

<sup>5</sup>These authors contributed equal to this work.

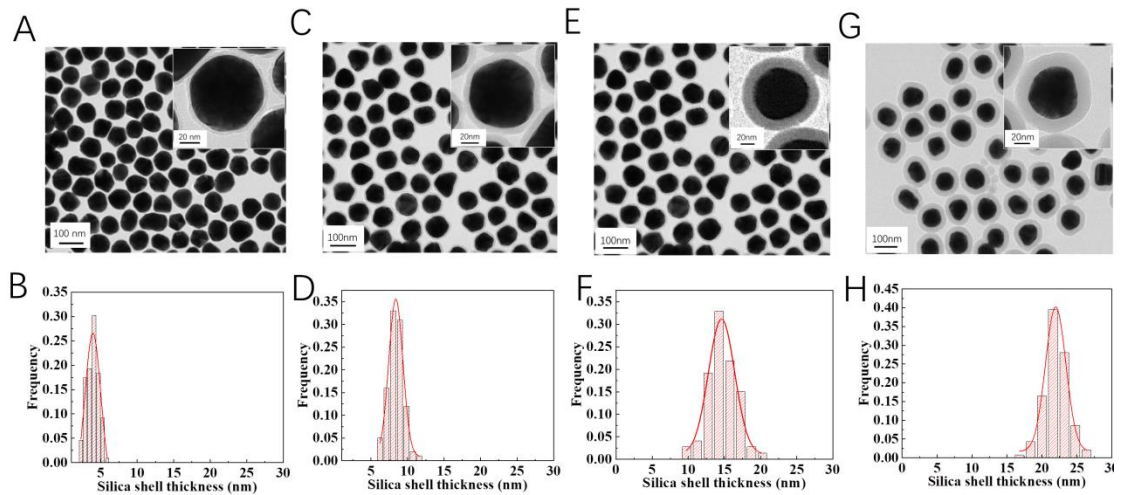

**Figure S1. TEM images and silica shell thicknesses distributions of 75 nm Au@SiO<sub>2</sub> NPs.** (A-B) 75 nm Au@4.0 ± 0.8 nm SiO<sub>2</sub> NPs, (C-D) 75 nm Au@8.4±1.1 nm SiO<sub>2</sub> NPs, (E-F) 75 nm Au@14.9±2.0 nm SiO<sub>2</sub> NPs, (G-H) 75 nm Au@24.6±2.7 nm SiO<sub>2</sub> NPs. Data are represented as mean ± TEM. Related to Figure 2.

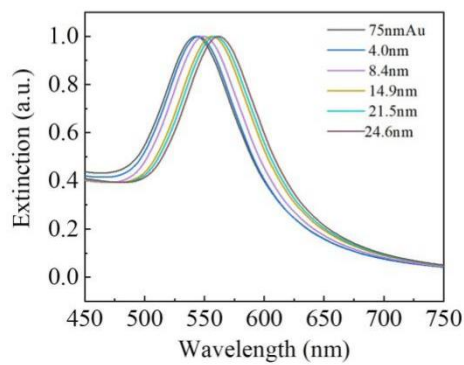

**Figure S2. UV-Vis spectra of the 75 nm Au@SiO<sub>2</sub> NPs.** Related to Figure 2.

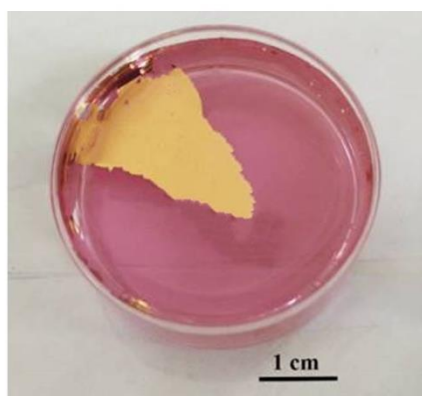

**Figure S3.** Photograph of the monolayered 75 nm Au@21.5 nm SiO<sub>2</sub> nanomembrane. Related to Figure 2.

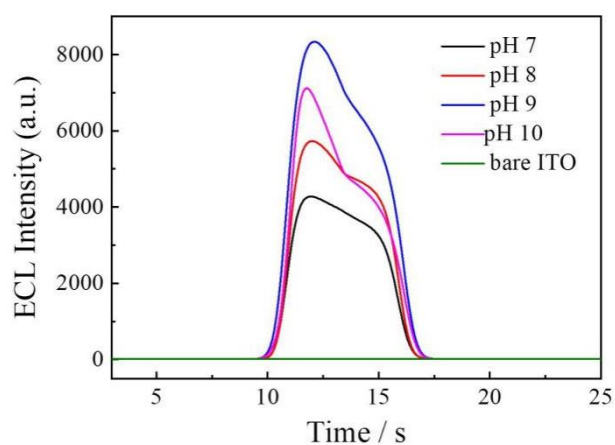

**Figure S4.** ECL intensity of the 75 nm Au@21.5 nm SiO<sub>2</sub> modified MASNE at 0.1 M PBS solution (containing 20  $\mu$  M Ru(bpy)<sub>3</sub><sup>2+</sup> and 0.1 mM tri-n-propylamine (TPrA)) with different pH value. Related to Figure 3.

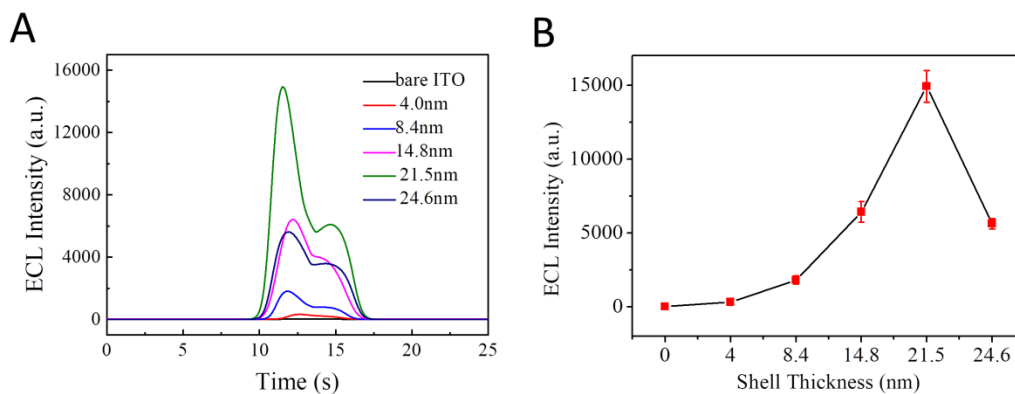

**Figure S5. ECL intensity of the 75 nm Au@ SiO<sub>2</sub> modified MASNE with different silica shell thicknesses (0.1 M PBS solution (pH=9) containing 20 μmol L<sup>-1</sup> Ru(bpy)<sub>3</sub><sup>2+</sup> and 0.1 mmol L<sup>-1</sup> TPrA). Related to Figure 3.**

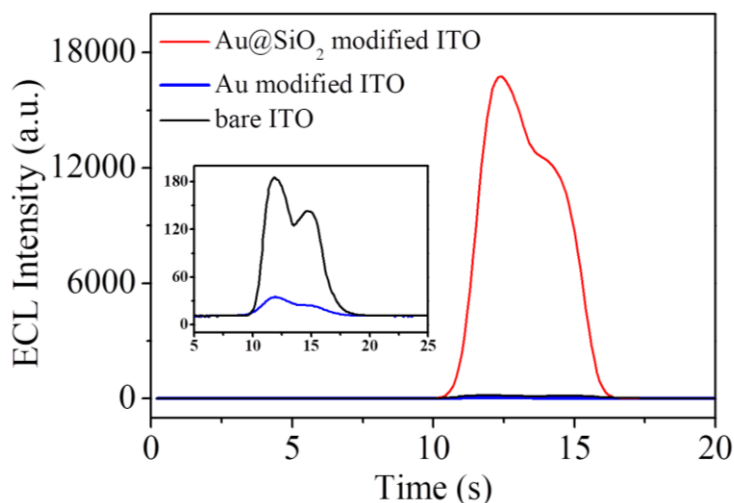

**Figure S6. The comparison of ECL intensity between 75nm Au@21.5 nm SiO<sub>2</sub> NPs and 75 nm AuNPs fabricated ECL electrodes using Ru@SiO<sub>2</sub> as luminophore. Inset: enlarged image of ECL intensity of Au modified ITO and bare ITO electrode. Related to Figure 3.**

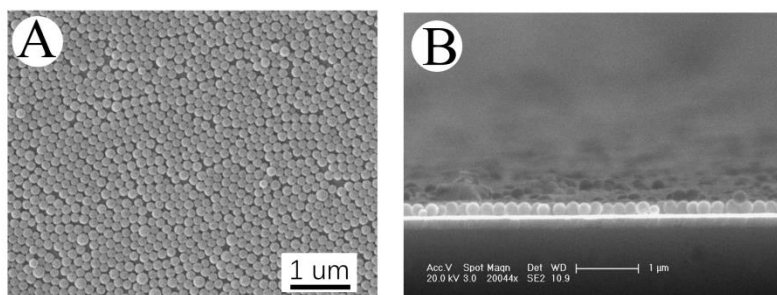

**Figure S7.** SEM images of the fabricated monolayered SiO<sub>2</sub> nanomembrane-based ECL electrode. (A) Top view, (B) Side view of the SEM image. Related to Figure 3.

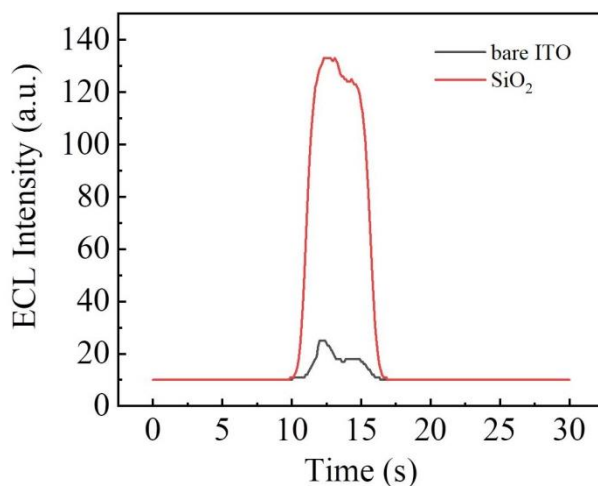

**Figure S8.** ECL intensity of bare SiO<sub>2</sub>NPs fabricated MASNE in 0.1 M PBS (pH=9) buffer containing 20 μM Ru(bpy)<sub>3</sub><sup>2+</sup> and 0.1 mM tripropylamine (TPrA). Related to Figure 3.

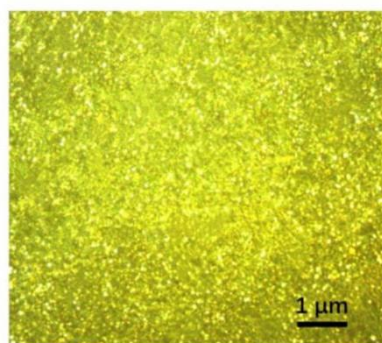

**Figure S9.** Microscopy-based selected area dark field scattering image of the MASNE constructed with 75 nm Au@21.5 nm SiO<sub>2</sub> NPs. Related to Figure 3.

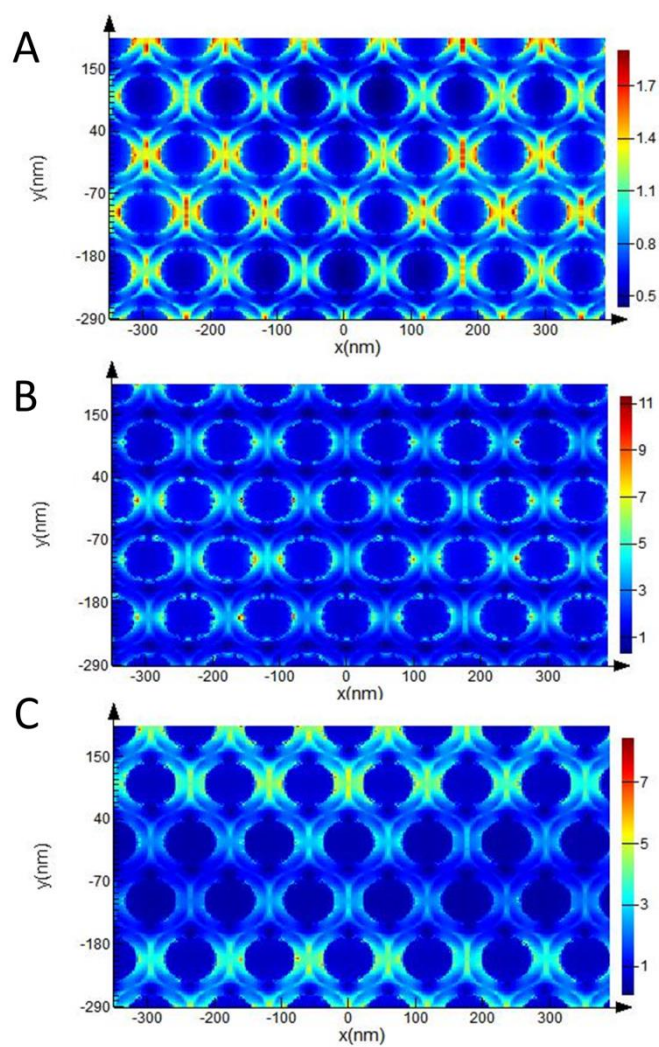

**Figure S10.** Wavelength dependent EM field enhancement with excitation light of (A) 450 nm, (b) 550 nm, (c)700 nm. Related to Figure 3.

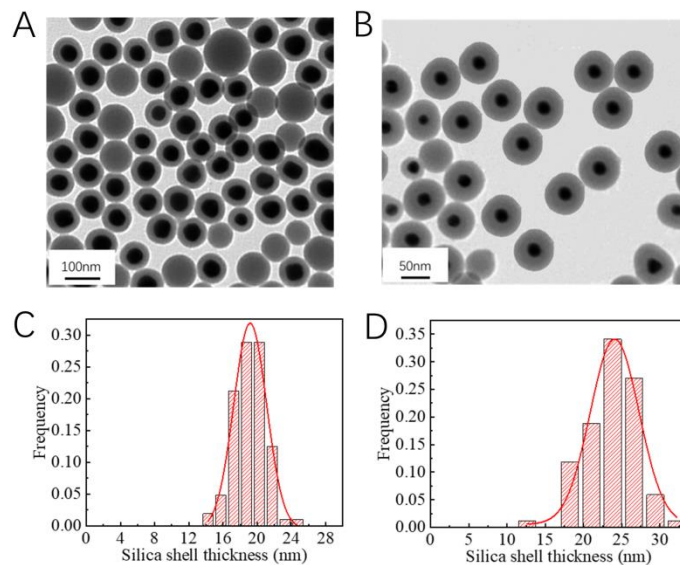

**Figure S11. TEM images and silica shell thicknesses distributions of Au@SiO<sub>2</sub> NPs.** (A, C) 50 nm Au@19.9±1.9 nm SiO<sub>2</sub>. (B, D) 20 nm Au@22.5±3.2 nm SiO<sub>2</sub>. Related to Figure 3.

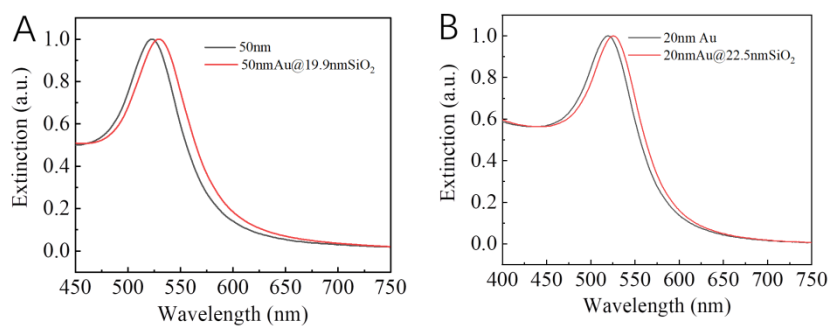

**Figure S12. UV-Vis spectra of Au@SiO<sub>2</sub> NPs.** (A) 50 nm Au@19.9±1.9 nm SiO<sub>2</sub>. (B) 20 nm Au@22.5±3.2 nm SiO<sub>2</sub>. Related to Figure 3.



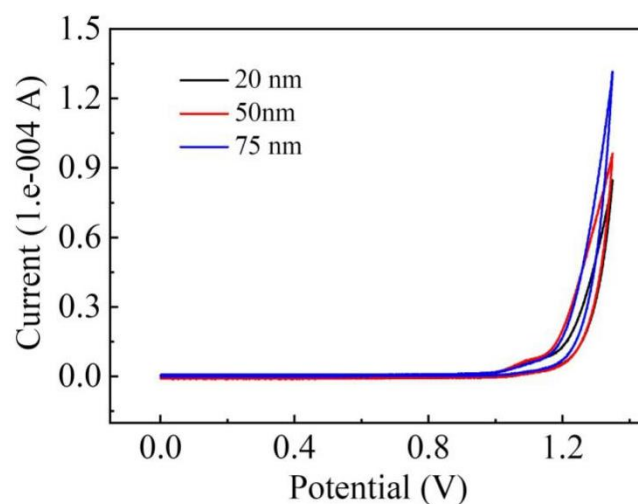

**Figure S13. Simultaneous electrochemical measurements of ECL electrodes modified with different Au@21.5 nm SiO<sub>2</sub> NPs. Related to Figure 3.**

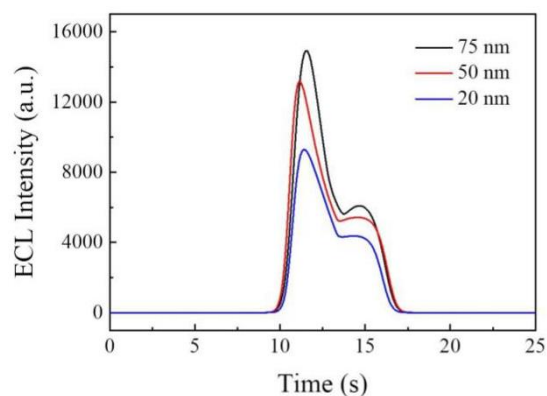

**Figure S14. The ECL intensity of the Au@21.5 nm SiO<sub>2</sub>-based MASNEs with different AuNPs sizes in 0.1 M PBS (pH=9) buffer containing 20 μM Ru(bpy)<sub>3</sub><sup>2+</sup> and 0.1 mM tripropylamine (TPrA). Related to Figure 3.**

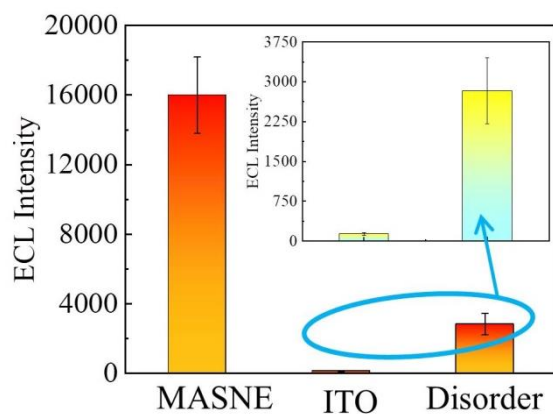

**Figure S15. Comparison of ECL intensity between 75 nm Au@21.5 nm SiO<sub>2</sub> NPs-based MASNE, ITO and disorderly stacked 75 nm Au@21.5 nm SiO<sub>2</sub> NPs fabricated ECL electrode. Related to Figure 3.**

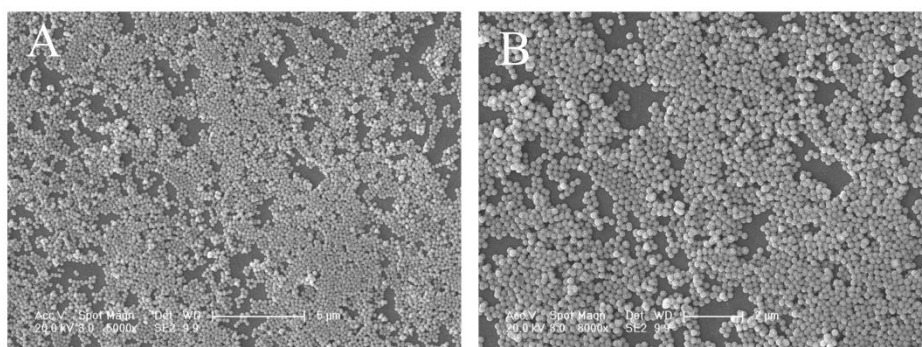

**Figure S16. SEM images of the disordered Au@SiO<sub>2</sub> fabricated ECL electrode. Related to Figure 3.**

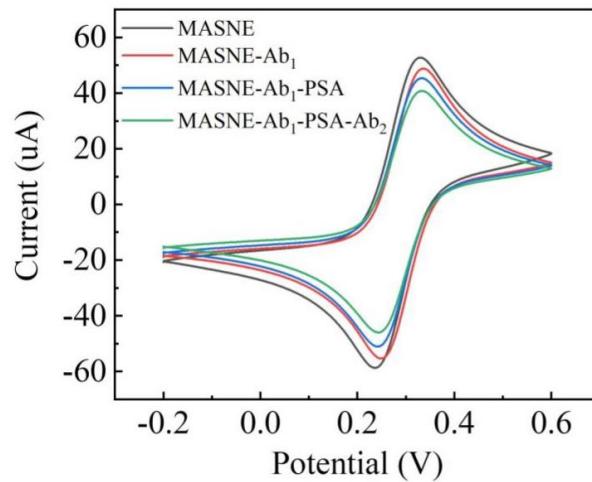

**Figure S17.** Cyclic voltammograms (in 2 mM  $K_3Fe(CN)_6$  solution, sweep rate 50 mV/s) for the ECL sensing platform during the fabrication. Compared with the bare MASNE, the peak current decreases after every modification step because of the poor conductivity of the biomolecules and  $Ru@SiO_2$ . Related to Figure 5.

**Table S1.** Comparison of ECL immunosensor with other reported immunosensors for determination of PSA. Related to Figure 5.

| methods                           | linear range                                                 | detection limit                  | reference             |
|-----------------------------------|--------------------------------------------------------------|----------------------------------|-----------------------|
| electrochemical                   | -                                                            | $0.9 \text{ pg mL}^{-1}$         | (Zheng et al., 2005)  |
| enzyme-linked immunosorbent assay | -                                                            | $14 \text{ fg mL}^{-1}$ (0.4 fM) | (Rissin et al., 2010) |
| electrochemical                   | $0.4\text{-}40 \text{ ng mL}^{-1}$                           | $4 \text{ pg mL}^{-1}$           | (Yu et al., 2006)     |
| SERS                              | $5.0 \text{ pg mL}^{-1}\text{-}50 \text{ ng mL}^{-1}$        | $0.012 \text{ ng mL}^{-1}$       | (Cheng et al., 2017)  |
| Bio-bar-code assay                | -                                                            | $0.003\text{-}0.03 \text{ fM}$   | (Nam et al., 2003)    |
| ECL                               | $0.5\text{-}500 \text{ ng mL}^{-1}$                          | $0.058 \text{ ng mL}^{-1}$       | (Shao et al., 2018)   |
| ECL                               | $5.0 \text{ pg mL}^{-1}\text{-}5.0 \text{ ng mL}^{-1}$       | $0.8 \text{ pg mL}^{-1}$         | (Qi et al., 2014)     |
| ECL                               | $10 \text{ fg mL}^{-1}\text{-}1 \text{ }\mu\text{g mL}^{-1}$ | $3 \text{ fg mL}^{-1}$ (~0.1 fM) | This work             |

## **Transparent Methods**

### **Materials**

3-Aminopropyltrimethoxysilane (APTMS), Tri(2,2'-bipyridyl)dichlororuthenium (II) hexahydrate ( $\text{Ru}(\text{bpy})_3\text{Cl}_2 \cdot 6\text{H}_2\text{O}$ ), Sodium citrate ( $\text{Na}_3\text{CA}$ ), Tripropylamine (TPrA), sodium silicate ( $\text{Na}_2\text{SiO}_3$ ) were purchased from Sigma-Aldrich.  $\text{HAuCl}_4 \cdot 4\text{H}_2\text{O}$ , methanol, n-hexane were purchased from Beijing Chemical Factory (Beijing, China). Tetraethyl orthosilicate (TEOS) and Triton X-100 (TX-100) were purchased from Aladdin Co., Ltd. ITO-coated glass was purchased from Zhuhai Kaivo Optoelectric Technology Co., Ltd. 3-(Triethoxysilyl)propylsuccinic anhydride was purchased from Innochem Co., Ltd. Bovine serum albumin (BSA), IgG, Mb, PSA, AFP, cTnI were purchased from Sinopharm Chemical Reagent Co. Ltd. (Beijing, China). All of the chemicals were used without further purification. Water used throughout all these experiments was purified with a Millipore system ( $18.2 \text{ M}\Omega \cdot \text{cm}$ ).

### **Characterization**

The size and morphologies of the  $\text{Au}@\text{SiO}_2$  NPs were characterized with a JEM-2100F transmission electron microscope (TEM) and scanning electron microscope (SEM) images were performed with an XL30 ESEM SEM. The UV-vis absorption spectra were obtained by a UV-2600 spectrophotometer (Shimadzu). Optical microscopy-based selected area dark-field scattering images and spectra were obtained by using an inverted Leica DMI6000B microscope (Germany), equipped with a Princeton spectrometer (PIXIS 256). The ECL experiments were performed on a MPI-A multifunctional electrochemical and chemiluminescent analytical system (Xi'an Remax Electronic Science & Technology Co. Ltd., 350-650 nm). The voltage of the photomultiplier tube (PMT) was set at 500 V. The experiments were carried out with a conventional three-electrode system. The working, counter and reference electrodes were ITO electrode, Pt wire and Ag/AgCl electrode, respectively.

### **Synthesis of $\text{Au}@\text{SiO}_2$ NPs**

The AuNPs with different size were synthesized by the methods reported elsewhere. (Frens, 1973; Haiss et al., 2007)  $\text{Au}@\text{SiO}_2$  NPs of different silica shell

thicknesses were synthesized by the method reported by Tian's group and our previous work (Li et al., 2010) with minor modification. Typically, 700  $\mu\text{L}$  of fresh prepared 1 mM APTMS was drop-wise added to 30 mL of 75 nm gold sol and stirred for 20 min vigorously; then about 4 mL of 0.54%  $\text{Na}_2\text{SiO}_3$  and 100  $\mu\text{L}$  of 0.1 M  $\text{H}_2\text{SO}_4$  was added in the mixture and heated at 90  $^\circ\text{C}$  for a period of time. After cooling to the room temperature, the nanoparticles were centrifuged at 4000 rpm for 18 min and diluted to 10 mL with deionized water. Au@SiO<sub>2</sub> NPs with tunable shell-thickness (4~8 nm) can be obtained by carefully controlling the reaction time, pH and concentration. In order to further increase the silica shell thickness, 10 mL Au@8 nm SiO<sub>2</sub>NPs obtained were added to a mixture of 40 mL ethyl alcohol and 600  $\mu\text{L}$   $\text{NH}_3 \cdot \text{H}_2\text{O}$ , then a certain amount of 1% TEOS were added. After stirring at room temperature for 12, 24, 36 h, Au@SiO<sub>2</sub> NPs with silica shell thicknesses of ~15, ~22 and ~25 nm were obtained respectively.

#### **Modification of Au@SiO<sub>2</sub> NPs**

In order to improve the quality of the self-assembled nanomembrane, Au@SiO<sub>2</sub> NPs with silica shell thicknesses of ~15 nm, ~22 nm, ~25 nm were carboxylated with 3-(Triethoxysilyl)propylsuccinic anhydride by the following steps. Firstly, the as-prepared Au@SiO<sub>2</sub> NPs were centrifuged at 5000 rpm three times and diluted with isopropanol. Then, 0.5 mL of 10 mM 3-(Triethoxysilyl)propylsuccinic anhydride were added and heated at 85 $^\circ\text{C}$  for 24 h. Finally, the nanoparticles were centrifuged at 6000 rpm for three times and diluted with deionized water to 10 mL.

#### **Fabrication of monolayered Au@SiO<sub>2</sub> nanomembrane-based ECL electrode (MASNE)**

ITO glass was firstly cleaned with sonication in water, acetone, ethyl alcohol and finally in water for 10 min, respectively. Then, each slide was placed in a solution of 5:1:1  $\text{H}_2\text{O} + 30\% \text{H}_2\text{O}_2 + 25\% \text{NH}_3$  and heated at 80  $^\circ\text{C}$  for about 20 min. Finally, the ITO glasses were dried with  $\text{N}_2$ . The monolayer Au@SiO<sub>2</sub> nanomembranes were prepared by a method of liquid/liquid interface self-assembly (LLISA). Typically, 3 mL of Au@SiO<sub>2</sub> NPs was added to a plastic container, then 460  $\mu\text{L}$  of n-hexane was added to form a two-phase interface. Then, 3.7 mL of methanol was poured rapidly

into the mixture to capture the nanoparticles at the hexane/water interface. After the evaporation of hexane, the nanoparticles were simultaneously self-assembled into a monolayer over a large area (up to several  $\text{cm}^2$ ) at the water/hexane interface. Then the nanomembranes were transferred carefully from the “soft” air–water interface onto the ITO electrodes as depicted in our method reported elsewhere. (Wu et al., 2016) The disordered nanomembranes-based ECL electrode was prepared by a dropping method with the same amount of Au@SiO<sub>2</sub> NPs.

### **Preparation and modification of Ru@SiO<sub>2</sub> nanoparticles**

Based on the previous studies (Dong et al., 2016; Zhang and Dong, 2006), Ru@SiO<sub>2</sub> nanoparticles were prepared as follows: First, 1.80 mL of Triton X-100 were mixed with 7.5 mL of cyclohexane, 340  $\mu\text{L}$  of 40 mM Ru(bpy)<sub>3</sub><sup>2+</sup> and 1.8 mL of n-hexanol. After stirring for 30 min, 0.1 mL of TEOS was added into the solution. Then, the polymerization reaction was started by adding 60  $\mu\text{L}$  of NH<sub>3</sub> H<sub>2</sub>O. The solution was stirred for 24 h to obtain Ru@SiO<sub>2</sub> NPs, which were isolated by acetone, and followed by centrifuging and washing with isopropanol. The precipitation was dispersed with isopropanol to a final volume of 15 mL. In order to carboxylate the surface of Ru@SiO<sub>2</sub> NPs, 62 mg of 3-(Triethoxysilyl)propylsuccinic anhydride were added and heated at 85°C for 24 h. Finally, the nanoparticles were centrifuged at 8000 rpm for three times and diluted with deionized water to 15 mL.

### **Modification of Ru@SiO<sub>2</sub> NPs with Ab<sub>2</sub>.**

1 mL of Ru@SiO<sub>2</sub> NPs were mixed with 400  $\mu\text{L}$  EDC (0.35 M) and NHS (0.1 M) solution for 40 min under stirring. Subsequently, 200  $\mu\text{L}$  of Ab<sub>2</sub> (0.1 mg/mL) were added and stirred for 12 h at room temperature. Finally, the mixture was centrifuged and washed two times with water. Then the mixture was blocked by BSA solution for 1 h at room temperature, and thereafter centrifuged at 8000 rpm for 15 min. The precipitation was dispersed into 2 mL of 0.01M PBS (pH 7.4).

### **Fabrication of the PSA ECL biosensor**

Firstly, a MASNE was added into the mixture solution containing 400  $\mu\text{L}$  of EDC (0.35 M) and NHS (0.1 M) for 40 min. Then, 10  $\mu\text{L}$  of Ab<sub>1</sub> (0.1 mg/mL) were dropped

on the MASNE and incubated for 2 h at 25°C. Subsequently, the MASNE was washed with 0.01 M PBS (pH 7.4) to remove the nonspecific absorption of Ab<sub>1</sub>. The MASNE was then blocked with 3% BSA blocking solution for 2 h to block non-specific binding sites and washed with the washing buffer thoroughly. Next, 10 µL of PSA was dropped on the MASNE-Ab<sub>1</sub> and incubated for 2 h at 25°C. Thereafter, the decorated MASNE was washed with 0.01 M PBS (pH 7.4). At last, the decorated MASNE was incubated in the Ru@SiO<sub>2</sub>-Ab<sub>2</sub>NP solution for 4 h, and then washed with the washing buffer. The ECL tests were performed in 0.1 M PBS (pH=7.4) containing 0.1 mM TPrA and the linear scan potential was applied from 0-1.35 V with a scan rate of 100 mV/s.

## SUPPLEMENTAL REFERENCES

Cheng, Z., Choi, N., Wang, R., Lee, S., Moon, K.C., Yoon, S.-Y., Chen, L., and Choo, J. (2017). Simultaneous detection of dual prostate specific antigens using surface-enhanced raman scattering-based immunoassay for accurate diagnosis of prostate cancer. *ACS Nano* *11*, 4926-4933.

Dong, Y.-P., Chen, G., Zhou, Y., and Zhu, J.-J. (2016). Electrochemiluminescent sensing for caspase-3 activity based on Ru(bpy)<sub>3</sub><sup>2+</sup>-doped silica nanoprobe. *Anal. Chem.* *88*, 1922-1929.

Frens, G. (1973). Controlled nucleation for the regulation of the particle size in monodisperse gold suspensions. *Nature* *241*, 20-22.

Haiss, W., Thanh, N.T.K., Aveyard, J., and Fernig, D.G. (2007). Determination of size and concentration of gold nanoparticles from UV-Vis spectra. *Anal. Chem.* *79*, 4215-4221.

Li, J.F., Huang, Y.F., Ding, Y., Yang, Z.L., Li, S.B., Zhou, X.S., Fan, F.R., Zhang, W., Zhou, Z.Y., Wu de, Y., *et al.* (2010). Shell-isolated nanoparticle-enhanced Raman spectroscopy. *Nature* *464*, 392-395.

Nam, J.-M., Thaxton, C.S., and Mirkin, C.A. (2003). Nanoparticle-based bio-bar codes for the ultrasensitive detection of proteins. *Science* *301*, 1884-1886.

Qi, H., Li, M., Dong, M., Ruan, S., Gao, Q., and Zhang, C. (2014). Electrogenerated chemiluminescence peptide-based biosensor for the determination of prostate-specific antigen based on target-induced cleavage of peptide. *Anal. Chem.* *86*, 1372-1379.

Rissin, D.M., Kan, C.W., Campbell, T.G., Howes, S.C., Fournier, D.R., Song, L., Piech, T., Patel, P.P., Chang, L., Rivnak, A.J., *et al.* (2010). Single-molecule enzyme-linked immunosorbent assay detects serum proteins at subfemtomolar concentrations. *Nat. Biotechnol.* *28*, 595.

Shao, K., Wang, B., Nie, A., Ye, S., Ma, J., Li, Z., Lv, Z., and Han, H. (2018). Target-triggered signal-on ratiometric electrochemiluminescence sensing of PSA based on MOF/Au/G-quadruplex. *Biosens. Bioelectron.* *118*, 160-166.

Wu, H., Li, C., Zhao, Z., Li, H., and Jin, Y. (2016). Free-standing monolayered metallic nanoparticle networks as building blocks for plasmonic nanoelectronic junctions. *ACS Appl. Mater. Interfaces* *8*, 1594-1599.

Yu, X., Munge, B., Patel, V., Jensen, G., Bhirde, A., Gong, J.D., Kim, S.N., Gillespie, J., Gutkind,



J.S., Papadimitrakopoulos, F., *et al.* (2006). Carbon nanotube amplification strategies for highly sensitive immunodetection of cancer biomarkers. *J. Am. Chem. Soc.* *128*, 11199-11205.

Zhang, L., and Dong, S. (2006). Electrogenerated chemiluminescence sensors using  $\text{Ru}(\text{bpy})_3^{2+}$  doped in silica nanoparticles. *Anal. Chem.* *78*, 5119-5123.

Zheng, G., Patolsky, F., Cui, Y., Wang, W.U., and Lieber, C.M. (2005). Multiplexed electrical detection of cancer markers with nanowire sensor arrays. *Nat. Biotechnol.* *23*, 1294.
